# Supplementary material for: Prevalence and associated factors of hemorrhoids among adult patients visiting the surgical outpatient department in the University of Gondar Comprehensive Specialized Hospital, Northwest Ethiopia
Source: PubMed Central journal article supplement (PMC8057569; doi:10.1371/journal.pone.0249736), 2021-04-20
Supplement: pone.0249736.s001.pdf [file pone.0249736.s001.pdf]

## **Consent form**

Questionnaire for a research on prevalence and associated factors of hemorrhoids among adult surgical patients at university of Gondar compressive specialized hospital, North West Ethiopia in 2020.

## **Confidentiality and consent**

Hello, my name is \_\_\_\_\_; I am one of the data collectors in this study. The study is intended to assess prevalence and associated factors of hemorrhoids. To attain this purpose, your honest and genuine participation by responding to the questions prepared is very important and highly appreciated. I would like you to ask some personal questions. Your answers are completely confidential. No one will be told what you said in connection to your name. You don't have to answer any question if you do not want to and you can stop the interview at any time. However, your honest answer to these questions will help us to better understand the situation and will contribute to our study. We would greatly appreciate your help in participating in this study, would you be willing to participate.

If yes, proceed.

If no, thank you and stop here.

\_\_\_\_\_  
(Signature of the interviewer certifying  
that respondent has given informed  
consent verbally)

## Annexes 1: Questionnaire (English version)

**Questionnaire for a research on prevalence and associated factors of hemorrhoids among adult surgical patients at university of Gondar compressive specialized hospital, North West Ethiopia in 2020.**

Interviewer's Name \_\_\_\_\_

Date of interview \_\_\_\_\_

Supervisor's Name \_\_\_\_\_

Questionnaire No \_\_\_\_\_

| <b>A. Socio-demographic characteristics</b> |                                      |                                                                                                                                 |                            |
|---------------------------------------------|--------------------------------------|---------------------------------------------------------------------------------------------------------------------------------|----------------------------|
| <b>No</b>                                   | <b>Question</b>                      | <b>Response</b>                                                                                                                 | <b>Remark</b>              |
| 101                                         | Sex                                  | 1) Male<br>2) Female                                                                                                            |                            |
| 102                                         | Age                                  | _____ years                                                                                                                     |                            |
| 103                                         | Place of residence                   | 1) Urban<br>2) Rural                                                                                                            |                            |
| 104                                         | Occupation of the study participant? | 1) Civil servant<br>2) Merchant<br>3) Farmer<br>4) Housewife<br>5) Self employed<br>6) Daily laborer<br>7) Student<br>8) Others | Others<br>specify<br>_____ |
| 105                                         | Religion of the study participant?   | 1) Orthodox<br>2) Muslim<br>3) Protestant<br>4) Catholic<br>5) Others                                                           | Others<br>specify<br>_____ |

|     |                                            |                                                                                                                                                                                        |  |
|-----|--------------------------------------------|----------------------------------------------------------------------------------------------------------------------------------------------------------------------------------------|--|
| 106 | Education status of the study participant? | 1) Unable to read & write<br>2) Able to read & write<br>3) Primary education (grade 1–8)<br>4) Secondary education (grade 9–10)<br>5) Preparatory (grade 11–12)<br>6) College or above |  |
| 107 | Marital Status of the study participant?   | 1) Single<br>2) Married<br>3) Divorced<br>4) Widowed<br>5) separated                                                                                                                   |  |
| 108 | Average monthly income                     | _____                                                                                                                                                                                  |  |

B. Clinical, obstetric and behavioral factors

|     |                                                                                                |                 |  |
|-----|------------------------------------------------------------------------------------------------|-----------------|--|
| 201 | Do you have family history of hemorrhoid?                                                      | 1. Yes<br>2. No |  |
| 202 | Do you eat fruits and vegetables?                                                              | 1. Yes<br>2. No |  |
| 203 | If yes, how many times do you eat fruits and vegetables in a week?                             | _____ days      |  |
| 204 | Do you eat fat meals?                                                                          | 1. Yes<br>2. No |  |
| 205 | If yes, how many times do you eat fat meals in a week?                                         | _____ days      |  |
| 206 | Do you have infrequent stool, difficulty in defecation or both at least for previous 3 months? | 1. Yes<br>2. No |  |

|     |                                                             |                                                                         |  |
|-----|-------------------------------------------------------------|-------------------------------------------------------------------------|--|
| 207 | Do you have repeated diarrhea?                              | 1. Yes<br>2. No                                                         |  |
| 208 | How many children do you have? for women only               | _____                                                                   |  |
| 209 | Do you smoke cigarettes?                                    | 1) Never<br>2) I used to smoke<br>3) I currently smoke                  |  |
| 210 | How would you describe your alcoholic habit?                | 1) Never drank alcohol<br>2) Previous alcoholic<br>3) Current alcoholic |  |
| 211 | Do you work physical exercise?                              | 1. Yes<br>2. Sometimes<br>3. No                                         |  |
| 212 | Have you diagnosed of hypertension by physician Previously? | 1. Yes<br>2. No                                                         |  |
| 213 | Do you use the anti-hypertensive drugs?                     | 1. Yes<br>2. No                                                         |  |
|     | <b>C. Physical examination</b>                              |                                                                         |  |
| 301 | Blood pressure measurement first reading                    | _____mmHg                                                               |  |
| 302 | Second reading                                              | _____mmHg                                                               |  |
| 303 | Third reading                                               | _____mmHg                                                               |  |
| 304 | Wight                                                       | _____kg                                                                 |  |
| 305 | Height                                                      | _____cm                                                                 |  |
| 306 | Body mass index                                             | _____kg/m <sup>2</sup>                                                  |  |
| 307 | Hemorrhoids                                                 | 1. Yes<br>2. No                                                         |  |

## Annex- 2: Amharic version questionnaire

ቃለ-መጠይቅ

በጎንደር ዩኒቨርሲቲ ጤና ሳይንስ ኮሌጅ ከሚመጡ የቀዶ ህክምና ታካሚዎች ላይ በኪንታሮት በሽታ ስርጭት ና ተያያዥ ምክንያቶች በተመለከተ ለማጥናት የተዘጋጀ ቃለ-መጠይቅ፡

ቃል መጠይቅ የሚያደርግው ስም -----

ቃል መጠይቅ የተደረገበት ቀን -----

የጥናቱ ተሳታፊ የሚስጥር ቁጥር -----

| ሀ. ማህበራዊ መስተጋብር ጥያቄዎች |             |                                                                                                            |      |
|-----------------------|-------------|------------------------------------------------------------------------------------------------------------|------|
| ተ.ቁ                   | ጥያቄ         | መልስ                                                                                                        | ምርመራ |
| 101                   | ጾታ          | 1. ወንድ<br>2. ሴት                                                                                            |      |
| 102                   | እድሜ /በአመት/  | _____                                                                                                      |      |
| 103                   | የመኖርያ ቦታ    | 1.ከተማ<br>2.ገጠር                                                                                             |      |
| 104                   | ስራ          | 1. አርሶ አደር<br>2. ነጋዴ<br>3. የመንግስት ተቀጣሪ<br>4. የቤት እመቤት<br>5. ተማሪ<br>6. የቀን ስራተኛ<br>7. ስራ አጥ<br>8. ሌላ( ይጥቀሱ) |      |
| 105                   | ሃይማኖት       | 1. ኦርቶዶክስ<br>2. ሙስሊም<br>3. ፕሮቴስታንት<br>4. ካቶሊክ<br>5. ሌላ (ይጥቀሱ)                                              |      |
| 106                   | የትምህርት ደረጃ  | 1. ማንበብና መጻፍ የማይችል<br>2. ማንበብና መጻፍ የሚችል<br>3. የመጀመሪያ ደረጃ /1-8/<br>4. ሁለተኛ ደረጃ /9-12/ክፍል<br>5. ኮሌጅና ከዚያ በላይ |      |
| 107                   | የጋብቻ ሁኔታ    | 1. አግብታ/ አብራ የምትኖር/የሚኖር<br>2. አግብታ/ቶ የፈታች/ታ<br>3. ባሏ/ሚስት የሞተባት/የሞተበት<br>4. ያላገባች<br>5. ሌላ ካለ ይጥቀሱ-----     |      |
| 108                   | አማካኝ የወር ገቢ | _____                                                                                                      |      |

| ለ. ከ ኪንታሮት በሽታ ጋር የተያያዙ ጥያቄዎች |                                                                       |                                                       |  |
|-------------------------------|-----------------------------------------------------------------------|-------------------------------------------------------|--|
| 201                           | ከቤተሰብዎት ውስጥ ኪንታሮት በሽታ ያለው አለ ?                                        | 1. አለ<br>2. የለም                                       |  |
| 202                           | ቅጠላቅጠል ና ፍራፍሬ ይመጋባሉ?                                                  | 1. አወ<br>2. አልመገብም                                    |  |
| 203                           | አወ ክሆነ መልስዎት ፤ በሳምንት ምን ያህል ቀን ቅጠላቅጠል ና ፍራፍሬ ይመጋባሉ?                   | _____ ቀን                                              |  |
| 204                           | ቅባት የበዛበት ምግብ ይመጋባሉ?                                                  | 1. አወ<br>2. አልመገብም                                    |  |
| 205                           | አወ ክሆነ መልስዎት ፤ በሳምንት ምን ያህል ቀን ቅባት የበዛበት ምግብ ይመጋባሉ?                   | _____ ቀን                                              |  |
| 206                           | ሽንት ቤት በሚወጡበት ወቅት ሰገራ ለመውጣት ያስቸግርዎታል ወይም የሆድ ድርቀት በዚህ 3 ወር ውስጥ አለውት ? | 1. አወ<br>2. የለም                                       |  |
| 207                           | በተደጋጋሚ ተቅማጥ ያምወታል?                                                    | 1. አወ<br>2. የለም                                       |  |
| 208                           | ስንት ልጆች አለውት? ለሴቶች ብቻ                                                 | -----                                                 |  |
| 209                           | ሲጋራ ያጨሳሉ?                                                             | 1. አጭሼ አላውቅም<br>2. አጨስ ነበር<br>3. አጨሳለው                |  |
| 210                           | አልኮል መጠጥ ይጠጣሉ?                                                        | 1. አልኮል ጠጥቸ አላውቅም<br>2. አልኮል አጠጣ ነበር<br>3. አልኮል አጠጣለው |  |

|                     |                                         |                                         |  |
|---------------------|-----------------------------------------|-----------------------------------------|--|
| 211                 | የአካል ብቃት እንቅስቃሴ ያደርጋል?                  | 1. አወ<br>2. አልፎ አልፎ አደርጋለሁ<br>3. አላደርግም |  |
| 212                 | የደም ግፊት በሽታ አለብዎት ተብሎ በሃኪም ተነግሮውት ያውቃል? | 1. አወ<br>2. የለም                         |  |
| 213                 | በሃኪም የታዘዘ የደም ግፊት መድሃኒት ይወስዳሉ?          | 1. አወ<br>2. የለም                         |  |
| <b>ሐ. አካላዊ ምርመራ</b> |                                         |                                         |  |
| 301                 | የ ደም ግፊት የመጀመሪያ ንባብ                     | _____mmHg                               |  |
| 302                 | ሁለተኛ ንባብ                                | _____mmHg                               |  |
| 303                 | ሶስተኛው ንባብ                               | _____mmHg                               |  |
| 304                 | የስውነት ክብደት                              | _____kg                                 |  |
| 305                 | ቁመት                                     | _____cm                                 |  |
| 306                 | የሰውነት መጠን መለኪያ                          | _____kg/m <sup>2</sup>                  |  |
| 307                 | ኪንታሮት በሽታ                               | 1. አለ<br>2. የለም                         |  |
